# Supplementary material for: Synthesis and enhanced luminescence of uniform and well-dispersed quasispherical YVO4:Ln3+(Ln = Eu, Dy) nanoparticles by a solvothermal method
Source: Royal Society of Chemistry journal article supplement (doi:10.1039/c1ce05725a), 2011-11-04
Supplement: c1ce05725a.pdf [file c1ce05725a.pdf]

## **Electronic supplementary information**

### **Synthesis and Enhanced Luminescence of Uniform and Well-Dispersed Quasispherical $\text{YVO}_4:\text{Ln}^{3+}$ ( $\text{Ln} = \text{Eu}, \text{Dy}$ ) Nanoparticles by a Solvothermal Method**

**Guang Jia,<sup>a,\*</sup> Cuimiao Zhang,<sup>a</sup> Shiwen Ding,<sup>a</sup> Liyong Wang,<sup>a</sup> Lanfen Li,<sup>a</sup> Hongpeng You<sup>b,\*</sup>**

<sup>a</sup> *College of Chemistry and Environmental Science, Hebei University, Baoding 071002, P. R. China;*

<sup>b</sup> *State Key Laboratory of Rare Earth Resource Utilization, Changchun Institute of Applied Chemistry, Chinese Academy of Sciences, Changchun 130022, P. R. China*

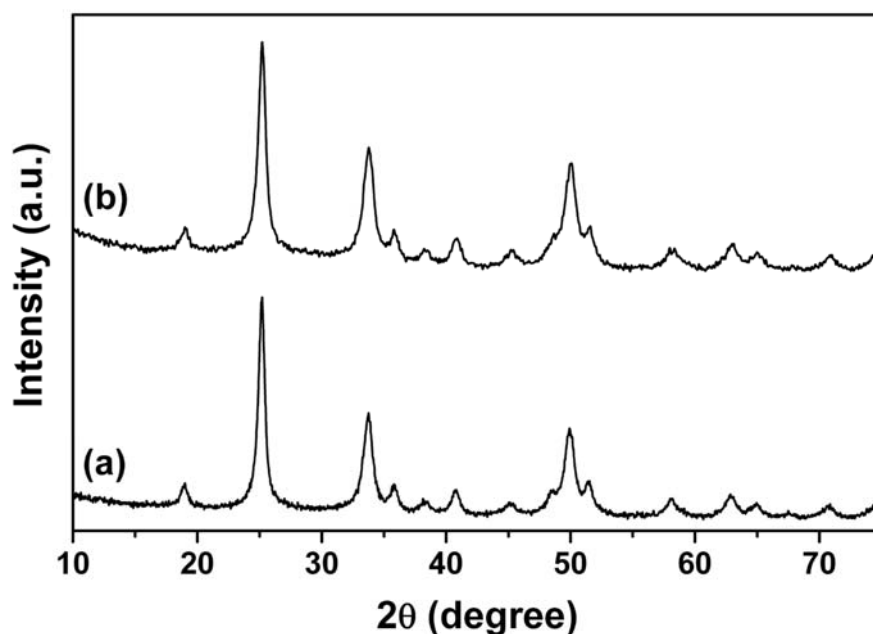

**Figure S1.** XRD patterns of (a)  $\text{YVO}_4:\text{Eu}^{3+},\text{Ba}^{2+}$  and (b)  $\text{YVO}_4:\text{Dy}^{3+},\text{Ba}^{2+}$  samples prepared at 120 °C for 24 h.

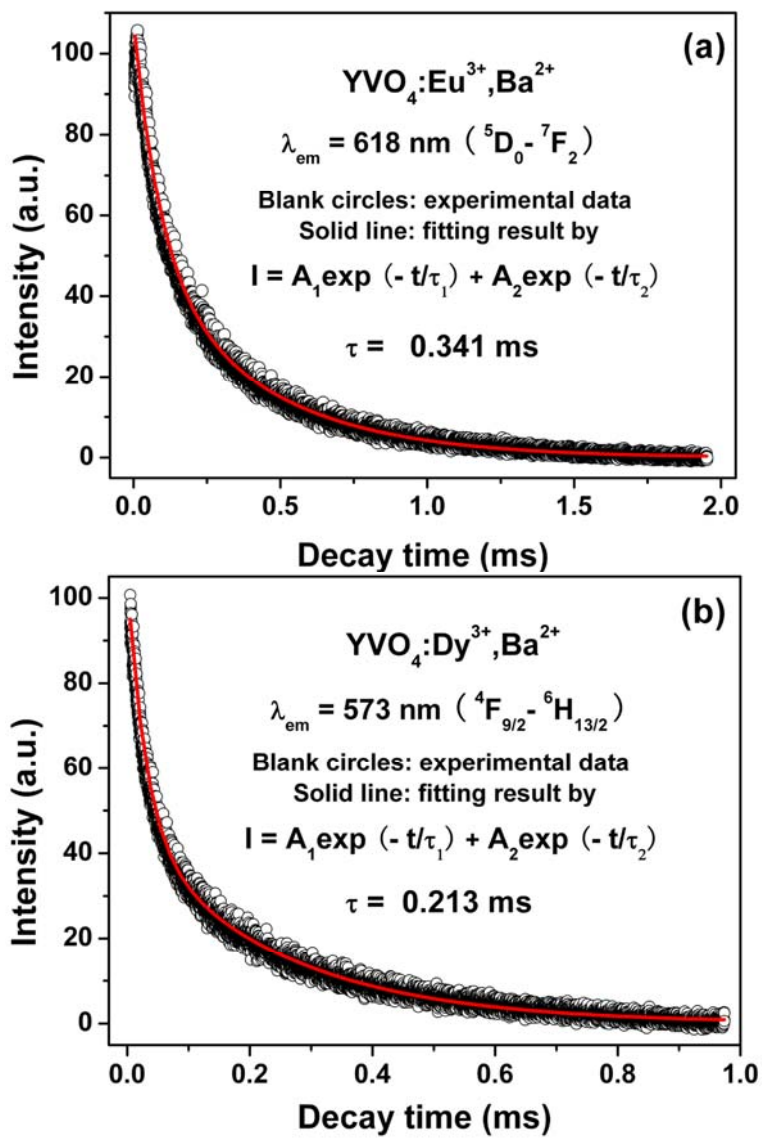

**Figure S2.** Decay curves for the as-prepared samples: (a) YVO<sub>4</sub>:Eu<sup>3+</sup>,Ba<sup>2+</sup>, (b) YVO<sub>4</sub>:Dy<sup>3+</sup>,Ba<sup>2+</sup>.
